# Supplementary material for: Analysis of Risk Factors for Severe Acute Respiratory Infection and Pneumonia and among Adult Patients with Acute Respiratory Illness during 2011-2014 Influenza Seasons in Korea
Source: PubMed Central journal article supplement — Infect Chemother. 2016 Nov 22;48(4):294–301. doi: 10.3947/ic.2016.48.4.294 (PMC5204008; doi:10.3947/ic.2016.48.4.294), 2016-11-22
Supplement: ic-48-294-s001.pdf [file ic-48-294-s001.pdf]

**Supplementary Table 1.** The result of respiratory virus PCR test

|                                   | Admission |         | Out-patient department |         |
|-----------------------------------|-----------|---------|------------------------|---------|
|                                   | ILI       | Non-ILI | ILI                    | Non-ILI |
| Total cases                       | 682       | 68      | 4,709                  | 32      |
| <b>Influenza antigen test</b>     |           |         |                        |         |
| Influenza A                       | 388       | 26      | 970                    | 12      |
| Influenza B                       | 145       | 16      | 301                    | 4       |
| Influenza A & B                   | 13        | 1       | 43                     | 1       |
| Negative                          | 136       | 25      | 3,395                  | 15      |
| <b>Respiratory virus PCR test</b> |           |         |                        |         |
| Influenza A                       | 106       | 7       | 1,716                  | 7       |
| Influenza B                       | 19        | 2       | 299                    | 3       |
| 229E                              | 2         |         | 38                     |         |
| NL63                              | 3         |         | 4                      |         |
| Adv                               | 1         |         | 35                     | 1       |
| HBoV                              | 1         |         | 6                      |         |
| HRV                               | 10        | 1       | 45                     |         |
| RSVA                              | 5         |         | 41                     |         |
| RSVB                              |           |         | 38                     | 1       |
| MPV                               | 1         |         | 125                    | 1       |
| PIV1                              | 9         |         | 102                    |         |
| PIV2                              |           |         | 17                     |         |
| PIV3                              |           |         | 15                     |         |
| PIV4                              |           |         | 5                      |         |
| Negative                          | 70        | 3       | 1,997                  | 11      |
| No sample                         | 276       | 57      | 130                    | 8       |

PCR, polymerase chain reaction; ILI, influenza-like illness; non-ILI, Non-influenza-like illness; 229E, human coronaviruses 229E; NL63, human coronaviruses NL63; adv, Adenovirus; HBoV, human boca virus; HRV, human rhinovirus; RSVA, respiratory syncytial virus A; RSVB, respiratory syncytial virus B; MPV, metapneumovirus; PIV, parainfluenza virus.
